# Supplementary material for: Management of Water Supply in the Cultivation of Different Agaricus bisporus Strains
Source: MDPI journal article supplement (doi:10.3390/agronomy13102626), 2023-10-17
Supplement: s1 [file s1]

## Supplementary material

Management of water supply in the cultivation of different *Agaricus bisporus* strains

Table S1: Precocity from the strains of *Agaricus bisporus*.

|             | Strains   | Precocity (%) |
|-------------|-----------|---------------|
| Control     | ABI 18/02 | 80.31         |
|             | ABI 18/04 | 76.71         |
|             | ABI 19/03 | 73.21         |
|             | ABI 11/19 | 84.43         |
| Added water | ABI 18/02 | 84.74         |
|             | ABI 18/04 | 69.72         |
|             | ABI 19/03 | 68.82         |
|             | ABI 11/19 | 77.80         |

The absence of letters indicates that there was no statistical difference by the

Scott-Knott test at 5% probability.
