# Supplementary material for: Management of Water Supply in the Cultivation of Different Agaricus bisporus Strains
Source: MDPI journal article supplement (doi:10.3390/agronomy13102626), 2023-10-17
Supplement: s1 [file s1]

Archive with 1 entries (1 files):
- agronomy-2622777-supplementary.pdf
